## Scale-Up of Voluntary Medical Male Circumcisions as Part of Combination HIV Prevention Strategies – Mozambique, 2010-2023

Marcos Canda, MSc<sup>1</sup>; Lúcio Matsimbe, MSc<sup>1</sup>; Nuno Gaspar, MD<sup>2</sup>; António Langa, MSCD<sup>3</sup>; Inácio Malimane, MD<sup>1</sup>; Jotamo Come, MD, PhD<sup>4</sup>; Daniel Chicavel, MSc<sup>4</sup>

<sup>1</sup> Division of Global HIV & TB, U.S. Centers for Disease Control and Prevention

<sup>2</sup> U.S. Agency for International Development, Maputo, Mozambique

<sup>3</sup> U.S. Department of Defense, Maputo, Mozambique

<sup>4</sup> Ministry of Health, Mozambique

Corresponding author: Marcos Canda, [mcanda@cdc.gov](mailto:mcanda@cdc.gov); phone: +258846877601

**Abstract** 262/300 words

**Introduction:** Voluntary Medical Male Circumcision (VMMC) is a cost-effective HIV prevention strategy that reduces the risk of female-to-male transmission by approximately 60%. Mozambique has implemented a national VMMC program since 2010, including HIV testing to identify HIV-positive men. We used program data to describe the President’s Emergency Plan for AIDS Relief (PEPFAR)-supported VMMC services in seven provinces in Mozambique.

**Methods:** We analyzed aggregate PEPFAR Monitoring, Evaluation, and Reporting data for 2010–2023 for VMMCs conducted and HIV testing at VMMC sites. Per the Population-Based HIV Impact Assessments conducted in Mozambique in 2021 (PHIA 2021), the VMMC coverage rate was obtained from the above survey, which accounted for responses from males who reported medical or traditional circumcisions in national surveys over the estimated population.<sup>3</sup> Test positivity rate was calculated as positive tests over the total tests conducted. Data were analyzed by fiscal year (October–September), age group (<15 years, 15–29 years, ≥30 years), and province.

**Results:** During 2010-2023, a total of 2,534,411 VMMCs were performed, of which 1,032,789 (41%) were among boys <15 years old, 1,368,582 (54%) among men aged 15–29, and 133,039 (5%), men aged >30. By 2023, national VMMC coverage was 77% (higher among men aged 20–24 years, at 80%). Overall HIV test positivity rate among VMMC clients was 1.6% (35,743 positives), ranging from 0.4% to 5.9% across provinces. Older men aged 45-49 had a higher HIV positivity rate of 24.3%.

**Conclusion:** VMMC implementation over twelve years reached priority boys and men aged 15-29 for immediate impact on HIV prevention. Essentially, the program has circumcised many boys and men, leading to higher VMMC coverage and anticipated reductions in HIV transmission. Further, services have helped identify men already living with HIV.

**Keywords:** Voluntary Medical Male Circumcision, HIV prevention

## Introduction

Voluntary medical male circumcision (VMMC) is a one-time surgery that reduces the risk of female-to-male sexual transmission of HIV by 60%.<sup>1</sup> In 2007, the World Health Organization and the Joint United Nations Programme on HIV and AIDS (UNAIDS) endorsed VMMC as part of combination prevention strategies to reduce new HIV infections. Starting in 2010, the U.S. President's Emergency Plan for AIDS Relief (PEPFAR) began supporting VMMC programming in prioritized countries in southern and eastern Africa.<sup>2</sup>

Mozambique is an HIV high-burden country with a prevalence rate of 12.5% in 2021, corresponding to an estimated 2,460,000 people living with HIV (PLHIV) in 2023.<sup>3</sup> Nationally, the HIV prevalence among adult men (aged ≥15 years) is 9.5%, corresponding to an estimated 830,000 men living with HIV.<sup>3</sup>

To increase VMMC as a form of HIV prevention, the Mozambique Ministry of Health (MOH), with support from PEPFAR, began staff training, program oversight, and quality assurance in 2010. PEPFAR implementing partners, along with community (for example, community lay mobilizers, faith-based organizations, public and private institutions such as sugar companies (Maragra, Xinavane, and Mafambisse) and institutional partners (ARCUMI, AJACOMO, and the Anglican Church), support program implementation by offering the VMMC package comprised of five primary interventions: counseling about reproductive and sexual health and risk factors for contracting HIV; HIV counseling and offer of testing for boys and men accessing VMMC services, with referral to care and treatment services for those testing positive; VMMC procedure; post-operative care (which focus is to reduce the chance of adverse events from occurring), and health facility and community engagement.

Since 2010, the VMMC program scaled up over three phases, with geographic prioritization based on HIV incidence. Provinces in the southern region (Gaza, Maputo Province, and Maputo City) had higher rates of HIV and lower circumcision coverage compared to the provinces in the central and northern regions. Cabo Delgado, Inhambane, Nampula, and Niassa provinces were excluded from programming because all four provinces perform traditional circumcision and had circumcision rates of ≥80% before the national scale-up of VMMC, with PEPFAR support. Overall, traditional circumcisions in Mozambique consist of the removal of most of the penis foreskin based on VMMC providers' observations of post-circumcision outcomes, especially in circumstances where the VMMC program provided post-op care to boys who received traditional circumcision, a model implemented in few places in the country.

During phase one (October 2010–September 2014), VMMC programming prioritized southern regions and the capital cities of provinces in the central region. During phase two (October 2015–September 2019), the VMMC program rapidly expanded to most districts and health facilities from the same provinces. A greater portion of VMMC sites opened in rural areas of Zambezia, Sofala, and parts of Tete and Manica provinces. Finally, in phase three (October 2020–September 2023), VMMC programming expanded to more districts, especially in rural areas. The phased scale-up of VMMC services allowed for a smooth and controlled expansion of services while ensuring clients’ safety and maintaining program quality.<sup>2</sup>

During the three phases of VMMC programming, the VMMC services delivery models, demand for services, and use of outreach approaches evolved. In general, VMMC programming has adapted to accommodate the growing demand for VMMC services, including extended operating hours, increased staffing, multi-partner collaboration, and VMMC mobile units to provide services in places with limited availability in health facilities. In phase one, services were offered at static sites, and demand was spontaneous. In phase two, the key programmatic feature was the use of outreach approaches. In this phase, the VMMC programming used static, temporary, and mobile surgical units to reach clients far away from health facilities; the program also used VMMC campaigns in combination with mobile units in locations with high demand for services. Additionally, VMMC teams started conducting more active demand-creation interventions, such as using community radio stations and community mobilizers to share information about VMMC. In phase three, the program continued to use outreach approaches in selected districts and health facilities with limited infrastructure, difficult road access, and where potential clients lived far away from health facilities. In addition, VMMC programming in phase three implemented free client transport for clients and their family members for clients who had difficulty accessing VMMC. While the VMMC program had consolidated its services’ provision model, it needed to respond to declining demand, especially in urban areas. During phases one and two, all boys and men aged  $\geq 10$  years were eligible to access VMMC services if they met the eligibility criteria: a) minimum age  $\geq 10$  years; b) Consent and/or assent; and c) absence of anatomical abnormalities. Fewer People Living with HIV (PLWH) who wished to undergo circumcision were offered VMMC services and informed that undergoing circumcision would not change their status for HIV. In phase three, the minimum age changed from 10 to 15 years. PEPFAR determined this age shift following increased adverse events (AE) among clients below 10 years. This policy change aimed at reducing the occurrence of AEs and improvement of program quality, which also recommended the use of the dorsal slit technique as the preferred VMMC technique for all clients as opposed to the forceps-guided technique, which had a higher probability for AEs incidence.

VMMC services include the offer of an HIV test to clients who decide to get circumcised. During phases one and two, HIV counseling and testing (HTC) was offered to all clients regardless of their age or whether they were sexually active. There was a need to find as many HIV-positive clients as possible and link them to care and treatment per the national HIV testing guidelines. During phase three, the VMMC programming used the national HIV risk screening tool before testing. Following this, the HIV positivity rate declined over time. The minimum age shift and the return to the universal offer of HIV testing in FY20 increased the positivity rate above the historical trend (Figure 2).

This analysis describes VMMC expansion since the program's onset in 2010 and HIV testing results from the VMMC program. Circumcision coverage refers to the number of men and boys circumcised both traditionally and medically, while VMMC coverage refers to the number of men and boys circumcised medically among the eligible male population in regions receiving PEPFAR support.

## Methods

Data for the VMMC program from all health facilities (HF) that are implementing the program were extracted from PEPFAR's Monitoring, Evaluation, and Reporting (MER) dataset for fiscal years (FY, October–September) 2010 to 2023).<sup>1</sup> Estimated circumcision coverage was sourced from the 2015 IMASIDA survey and the INSIDA 2021 survey.<sup>3,4</sup>

In Mozambique, two main surgical VMMC techniques are used: the dorsal slit and forceps-guide. Additionally, in 2023, the ShangRing device was piloted toward potential scale-up. The client follow-up rate was calculated as the number of clients who returned for a post-operation follow-up visit within 14 days after the VMMC procedure among all clients who received VMMC services, according to PEPFAR/national safety guidelines. HIV testing results were grouped into three categories: negative, positive, and indeterminate, following the national HIV testing guidelines. The HIV test positivity rate was calculated by dividing the number of clients who tested positive for HIV by the total number of clients tested. We analyzed VMMC and testing data by FY, program implementation phase (one, two, three), province, and age group (<15, 15–29, and ≥30 years) for VMMC clients who are tested as part of the VMMC package and before getting a circumcision.

---

<sup>1</sup> This activity was reviewed by CDC, deemed not research, and was conducted consistent with applicable federal law and CDC policy. See e.g., 45 C.F.R. part 46.102(l)(2), 21 C.F.R. part 56; 42 U.S.C. 241(d); 5 U.S.C. 552a; 44 U.S.C. 3501 et seq.

## Results

During FY 2010–2023, 2,550,371 clients were circumcised, of which 389,221 (15%) were circumcised during phase one, 1,513,295 (60%) during phase two, and 647,855 (25%) during phase three. During this time, estimated national circumcision coverage increased from 60% in 2010 to 77% in 2023. In 2023, the median provincial estimated VMMC coverage among 15-29 years old clients was 42% in Tete, Sofala was around 50%, Manica at 68%, Zambezia at 74%, Gaza at 81%, Maputo City at 88% and Maputo Province at 89%. The national estimated coverage in the same age range was 77%.

Figure 1 shows circumcision coverage in 2015 and 2021 by province. Circumcision coverage was above 90% in both years in the four provinces where circumcision is performed traditionally (the northern provinces of Niassa, Cabo Delgado, and Nampula, and the southern province of Inhambane). VMMC coverage increased in all PEPFAR-supported provinces. In the Southern provinces of Maputo and Maputo City, coverage reached 90% or more; in Gaza province, it neared 80%. In Tete and Manica provinces, coverage was below 50%. The national VMMC coverage in 2021 was 77% (Table 1).

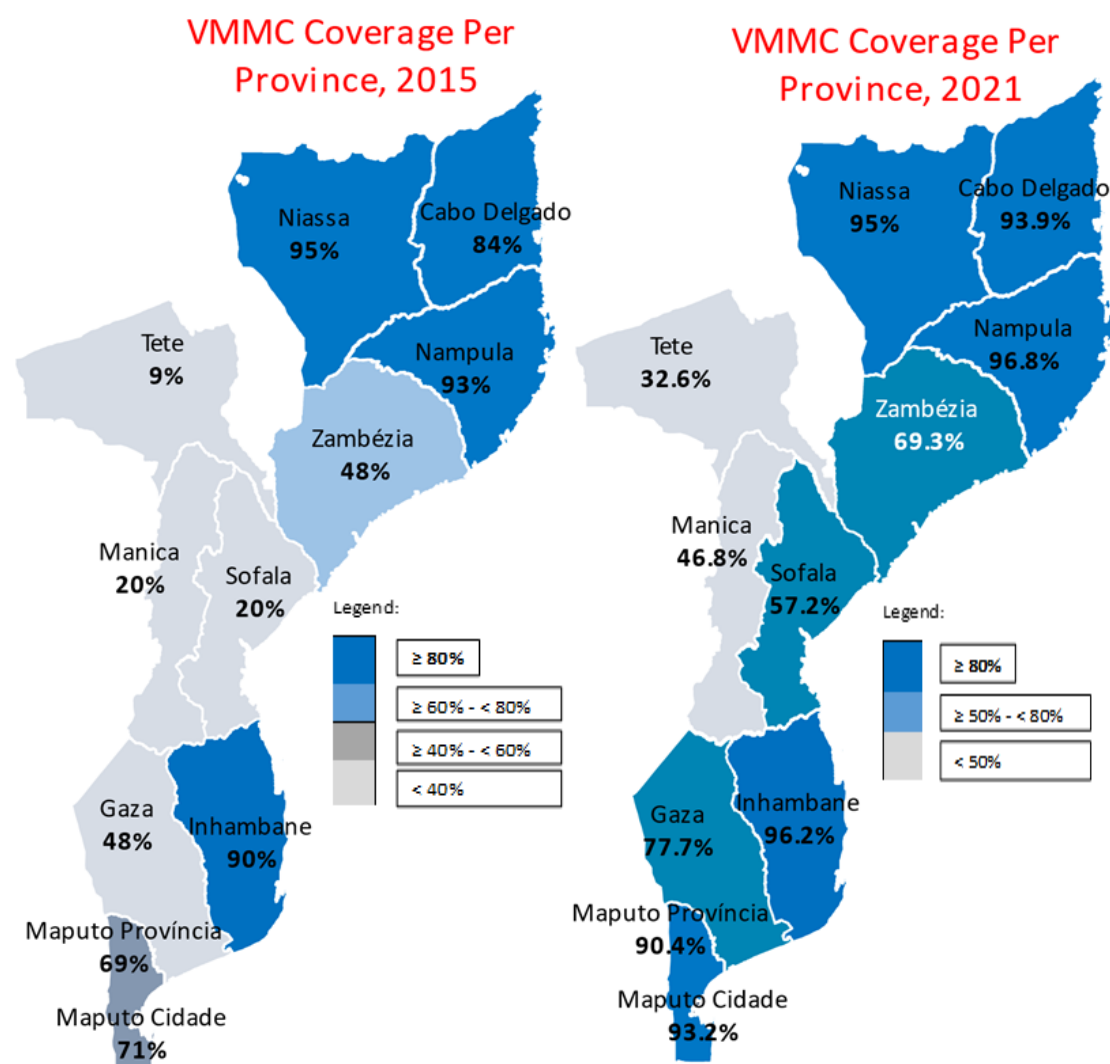

Figure 1: VMMC estimated coverage for 2015 and 2021 (1; 5)

Among all circumcisions performed, clients aged 15–29 years accounted for 55% (1,391,199/ 2,550,371). During phase one, clients <15 years old comprised 49% of all VMMC (192,437/389,221), 15-29 years old were 44% (171,844/389,221), and ≥30 years were 6% (24,940/389,221). In phase two, clients <15 years accounted for 47% of all VMMCs (718,025/1,513,295), 15–29 years old were 48% (720,964/1,513,295), and ≥30 years were 5% (74,306/1,513,295). In phase three, clients <15 years made up 14% of all VMMCs (89,705/647,855), 15–29 years were 77% (498,391/647,855), and ≥30 years were 9% (59,759/647,855).

Overall, the median annual circumcisions performed by province (Table 1) was 21,180 (range = 3,537 in Nampula Province to 62,865 in Zambezia Province). During phase one, the province with the lowest

contribution was Tete Province (2% [9,143/389,221]), and the highest contribution was from Maputo City (21% [83,181/389,221]). During phase two, Maputo City contributed the fewest (3% [49,939/1,513,295]), and Zambezia Province contributed the most (30% [447,942/1,513,29]). During phase three, Maputo City contributed the fewest (2% [11,363/ 647,855]), and Zambezia Province contributed the most (28% [180,055/647,855]) (Table 1).

During FY 2010–2023, among the 2,550,371 circumcised boys and men, 2,363,596 (93%) of clients were tested for HIV. Of these, 1,980,288 (84%) tested negative, 343,884 (14%) had indeterminate results, and 39,423 (2%) tested positive (Figure 2). HIV test positivity was lowest in Tete Province (0.4% [765/175,979]).

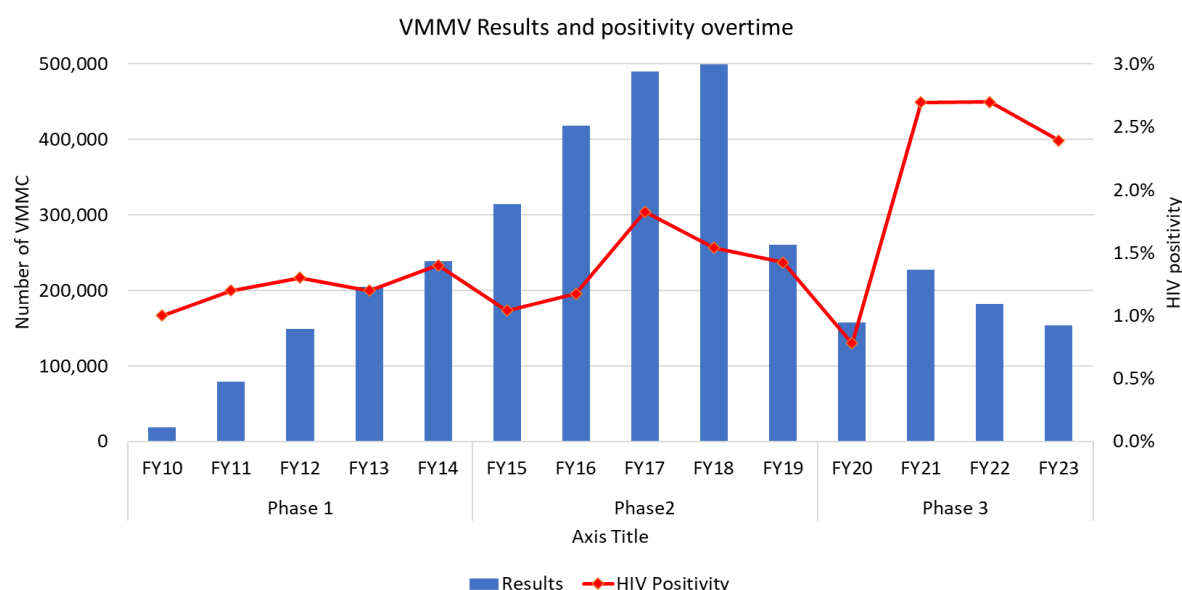

Figure 2: VMMC performance results and HIV positivity rates, 2010 - 2023

To calculate age-specific HIV positivity for HIV tests conducted among older men, we calculated the rate by dividing the number of men aged 45-49 years who tested HIV positive by the total number of HIV tests among men in the same age range. Fewer men in this age group seek VMMC than younger age groups. The small denominator and high absolute number of HIV-positive tests resulted in a higher HIV positivity rate in this age group.

VMMC has served as a key entry point for testing men.

Client follow-up within 14 days after male circumcision varied between 98% and 100% across provinces and age groups in the analysis period.

In fiscal year 2020, there is a marked drop in the number of people receiving VMMC services and in HIV positivity of HIV tests. This is likely because of the reduction of HIV preventive services that occurred during the COVID-19 pandemic nationwide. In addition, during the COVID-19 pandemic, there was a shift in the minimum age of eligibility for VMMC from 10 years to 15 years of age. This resulted in a reduction in the number of people receiving VMMC annually but also in an increase in HIV positivity. HIV positivity increased from 1.4% in 2019 to 2.6% in 2021.

## Discussion

Since 2010, VMMC programming has reached over 2.5 million boys and men, increasing VMMC coverage to almost 80% of the eligible population in Mozambique and preventing HIV infections as a part of a combination strategy.<sup>3</sup> Additionally, through HIV testing as part of the VMMC services, almost 40,000 clients with HIV were referred for care and treatment.

Despite these impressive achievements, challenges remain. VMMC coverage varies geographically and by age group, indicating that focused efforts are needed in remote areas and among men aged 15-29 years. The varying VMMC coverage across provinces and districts is likely because the program scale-up was performed in a phased manner.

Focused program implementation strategies, such as temporary VMMC campaigns to address the current unmet need using geographic estimation tools, can improve efficiency and facilitate reaching areas and populations with lower VMMC coverage. Improved data on the impact of VMMC on averted HIV infections would strengthen the planning and implementation of the sustainability phase of the VMMC portfolio.

The VMMC program moved from the use of a risk-screening HIV testing tool during phase 2 back to universal testing within phase 3 so that all clients are to be offered an HIV test. It is believed that during the period a screening tool was used, some HIV cases could have been missed. Thus, the program returned to universal testing. Universal screening likely contributed to an increase in the proportion of men testing positive for HIV, and in Mozambique, men are less likely than women to test for HIV. This increase in HIV test positivity could be explained by a shift in the testing denominator when eligibility for circumcision



changed from 10 years old to 15 years old. This resulted in the exclusion of sexually inactive boys, who have a low risk of HIV, from the denominator.

The proportion of people with HIV indeterminate status was higher than expected; most of those results are related to clients who were screened but never tested for HIV. The monitoring and evaluation system did not allow users to enter screening results. Therefore, all persons screened were considered to have indeterminate HIV status. The VMMC program implementation involves programmatic, policy, and natural and unexpected events that affect the performance and accessibility of services to some of the priority clients.

There are several limitations to this analysis. We analyzed PEPFAR program data, which are subject to reporting and data entry errors despite continual data quality assurance exercises. Program data also cannot be used to assess VMMC coverage or estimate HIV infections averted directly. Finally, these data do not capture circumcisions performed outside PEPFAR-supported VMMC sites.

## **Conclusion**

Despite some challenges, VMMC services in Mozambique continued to contribute to HIV prevention in combination with other prevention strategies, support case identification efforts, and focus on areas where VMMC coverage remains low.

**Table 1: Number of VMMC by Province and Phases**

| Provinces            | Phase 1        | Phase 2          | Phase 3        | Total VMMC       | Estimated Circumcision Coverage (2021) |
|----------------------|----------------|------------------|----------------|------------------|----------------------------------------|
| _Military Mozambique | -              | 122,794          | 106,697        | 229,491          | -                                      |
| Cabo Delgado         | -              | 1,349            | -              | 1,349            | 94%                                    |
| Cidade de Maputo     | 83,181         | 49,939           | 11,363         | 144,483          | 93%                                    |
| Gaza                 | 57,819         | 152,911          | 30,183         | 240,913          | 78%                                    |
| Manica               | 24,231         | 223,878          | 124,686        | 372,795          | 47%                                    |
| Maputo               | 59,573         | 96,415           | 38,315         | 194,303          | 90%                                    |
| Nampula              | 10,922         | 3,537            | -              | 14,459           | 97%                                    |
| Sofala               | 80,837         | 237,790          | 62,646         | 381,273          | 57%                                    |
| Tete                 | 9,143          | 176,740          | 93,910         | 279,793          | 33%                                    |
| Zambezia             | 63,515         | 447,942          | 180,055        | 691,512          | 69%                                    |
| <b>Total</b>         | <b>389,221</b> | <b>1,513,295</b> | <b>647,855</b> | <b>2,550,371</b> | <b>77%</b>                             |

**Conflict of Interest:** All authors declare no competing interests

**Funding Acknowledgement:** This manuscript has been supported by the President's Emergency Plan for AIDS Relief (PEPFAR) through the Centers for Disease Control and Prevention (CDC). The findings and conclusions in this manuscript are those of the author(s) and do not necessarily represent the official position of the funding agencies.

## References

1. Gray RH, Kigozi G, Serwadda D, et al. Male circumcision for HIV prevention in men in Rakai, Uganda: a randomised trial. *The Lancet* 2007;369:657-666. DOI: 10.1016/S0140-6736(07)60313-4.
2. Peck ME, Ong KS, Lucas T, et al. Voluntary Medical Male Circumcisions for HIV Prevention — 13 Countries in Eastern and Southern Africa, 2017–2021. *Morbidity and Mortality Weekly Report*. March 10, 2023 (<https://www.cdc.gov/mmwr/volumes/72/wr/mm7210a2.htm>).
3. National Institute of Health. Mozambique Population-based HIV Impact Assessment 2021 (INSIDA 2021): Final Report. Maputo: 2023.
4. Ministério da Saúde - MISAU INdE-I, and ICF,. Inquérito de Indicadores de Imunização, Malária e HIV/SIDA em Moçambique - IMASIDA, 2015. Maputo, Mozambique: 2018.
